# Supplementary material for: DNA Damage Differentially Activates Regional Chromosomal Loci for Tn7 Transposition in Escherichia coli
Source: Oxford University Press journal article supplement (doi:10.1534/genetics.108.088161), 2008-06-19
Supplement: genetics.108.088161-1.pdf [file genetics.108.088161-1.pdf]

Fig.S1

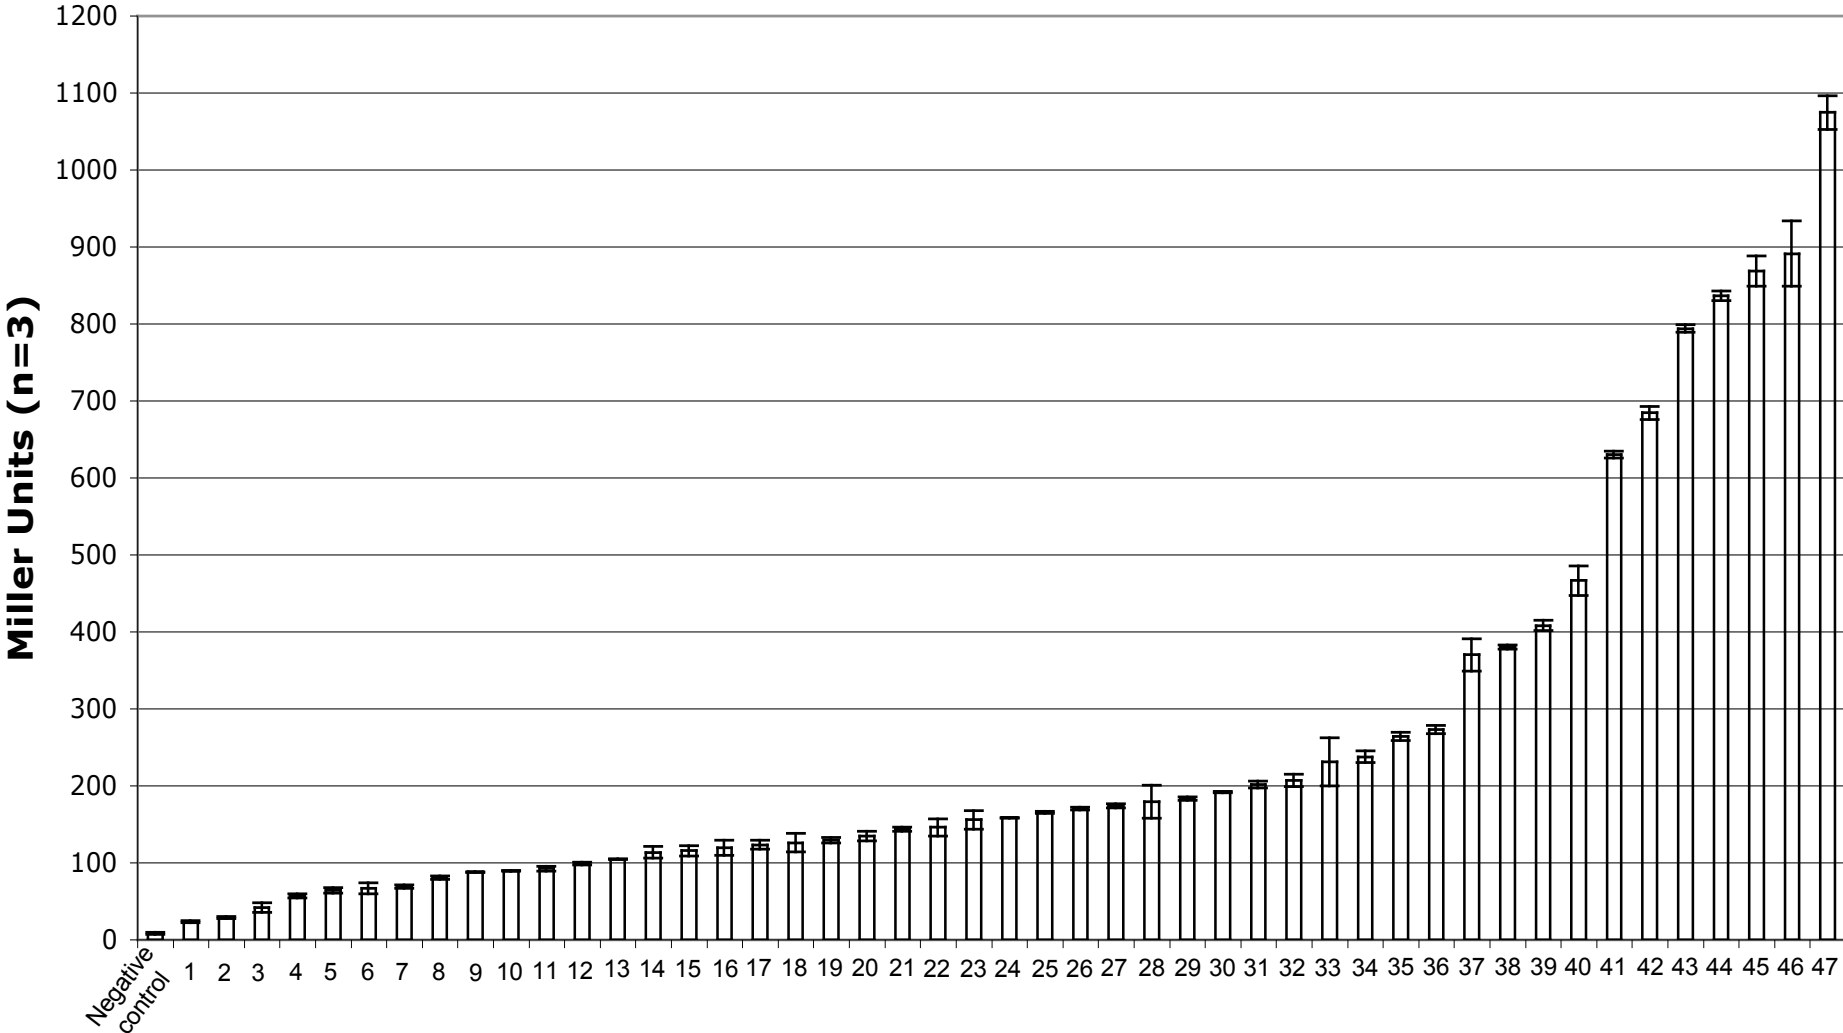

Fig. S1.  $\beta$ -Galactosidase activity found with the strains with TnsE-mediated Tn7-*lacZ* fusions. Strain JP617 was used as the negative control. 47 samples were shown in Figure 6 and other randomly selected isolates from new individual papillation assays. The data shown represent the average of triplicates of each sample. Error bars indicate the standard error of the mean.
